# Supplementary material for: The footprint of a historical paleoearthquake: the sixth-century-CE event in the European western Southern Alps
Source: Copernicus journal article supplement (doi:10.5194/nhess-23-3407-2023), 2023-11-09

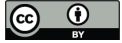

*Supplement of*

## **The footprint of a historical paleoearthquake: the sixth-century-CE event in the European western Southern Alps**

**Franz Livio et al.**

*Correspondence to:* Franz Livio ([franz.livio@uninsubria.it](mailto:franz.livio@uninsubria.it))

The copyright of individual parts of the supplement might differ from the article licence.

Supplementary File S1  
Stratigraphy

# Section 02FL

| Unit   | Thickness (cm) | Description                                                                                                                                                                                                                                                                                                                           |
|--------|----------------|---------------------------------------------------------------------------------------------------------------------------------------------------------------------------------------------------------------------------------------------------------------------------------------------------------------------------------------|
| 02FL00 | 83             | Dark grey plastic clayey-silts                                                                                                                                                                                                                                                                                                        |
| 02FL01 | 17             | Dark sandy silts passing downward to matrix supported gravels with abundant Fe-Mn coatings and concretions.                                                                                                                                                                                                                           |
| 02FL02 | 29             | Silty sands and sands alternating in lens-shaped thin beds, fining-upward into silts. At the base a level of matrix-supported gravel.                                                                                                                                                                                                 |
| 02FL03 | 15             | Fining-upward clast-supported gravel. Pebbles up to some cm in size. The base is strongly undulated due to load structures deforming the top and the layering of the underlying unit.                                                                                                                                                 |
| 02FL04 | 9              | Sandy silt with alternating light and dark laminae in plane parallel bedding. The top, base and the internal lamination is deformed by load casts of the overlying unit.                                                                                                                                                              |
| 02FL05 | 21             | Sandy silt in alternating light and dark colored layers, finely laminated. The laminae are strongly convoluted. Convolution is not affecting the overlying unit. The geometry and distribution of the convoluted laminae suggest a fluidization process that affected the unit. Load casts from unit 02FL04 deform this unit locally. |
| 02FL06 | 13             | Dark massive silts with frequent shells of <i>Unio</i> in                                                                                                                                                                                                                                                                             |

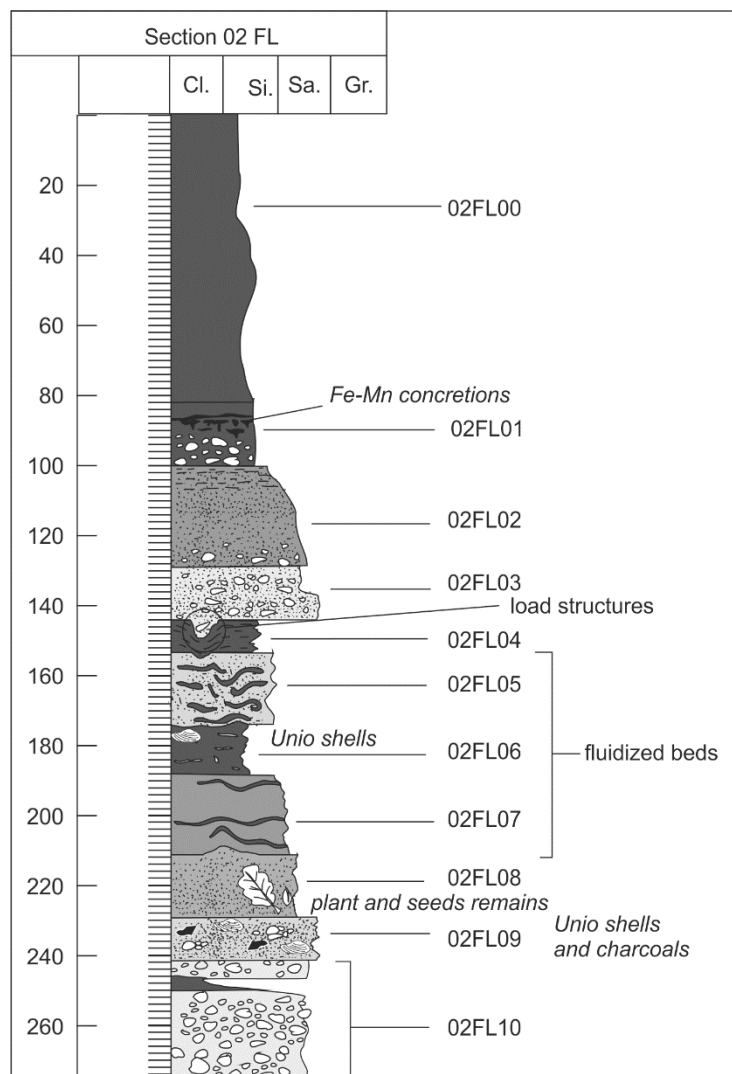

|        |    |                                                                                                                                                                      |
|--------|----|----------------------------------------------------------------------------------------------------------------------------------------------------------------------|
|        |    | entire specimen or broken fragments.                                                                                                                                 |
| 02FL07 | 23 | Silty sands alternating with thin beds of dark silts rich in organic matter. The entire bed is convoluted and homogenized, consistently with a fluidization process. |
| 02FL08 | 19 | Thin-bedded sandy layers alternating with dark silts in convolute geometry (fluidization). Frequent vegetation remains.                                              |
| 02FL09 | 12 | Sands with small lenses of gravel and frequent remain of <i>Unio</i> . Charcoals, brick, and ceramic fragments are abundant.                                         |
| 02FL10 | 35 | Clast-supported gravels with a thin lens of dark fine laminated silts included.                                                                                      |

# Section 03FL

| Unit   | Thickness (cm) | Description                                                                                                                                                                                                                                               |
|--------|----------------|-----------------------------------------------------------------------------------------------------------------------------------------------------------------------------------------------------------------------------------------------------------|
| 03FL11 | 3              | Weakly clayey silts, with plane parallel thin laminations and diffuse reddish coatings.                                                                                                                                                                   |
| 03FL12 | 12             | Coarse sands with fining-upward to weakly clayey fine sands and then coarsening-upward to coarse sands again.                                                                                                                                             |
| 03FL13 | 6              | Weakly sandy dark silts.                                                                                                                                                                                                                                  |
| 03FL14 | 29             | Clast-supported gravelly beds, roughly bedded in cycles of fining upward intervals. Clasts are sub-rounded to subangular and some cm in maximum size.                                                                                                     |
| 03FL15 | 14             | Clayey silts and thin discontinuous lenses of fine sand finely laminated. At the base rich coatings and concretions of Fe-Mn.                                                                                                                             |
| 03FL16 | 14             | Weakly clayey silts, more clayey at the base, with thin alternating lenses of fine sand, finely laminated. The base is constituted of a thin interval of matrix-supported gravel.                                                                         |
| 03FL17 | 7              | Matrix supported gravel in a silty-sandy matrix.                                                                                                                                                                                                          |
| 03FL18 | 28             | A silty-sandy interval. From the top: medium sand gradually passing downward to silty fine sand. Then, a level of fine sand gradually passing downward to weakly sandy silt. At the bottom, fine dark silts interbedded with thinly laminated fine sands. |
| 03FL19 | 30             | The unit consists of two fining-upward beds of coarse clast-supported gravel. Clasts are subrounded to subangular with aligned long axis of clasts.                                                                                                       |
| 03FL20 | 13             | Medium sands, weakly silty, with increasing silty component downward and an overall inverse gradation.                                                                                                                                                    |

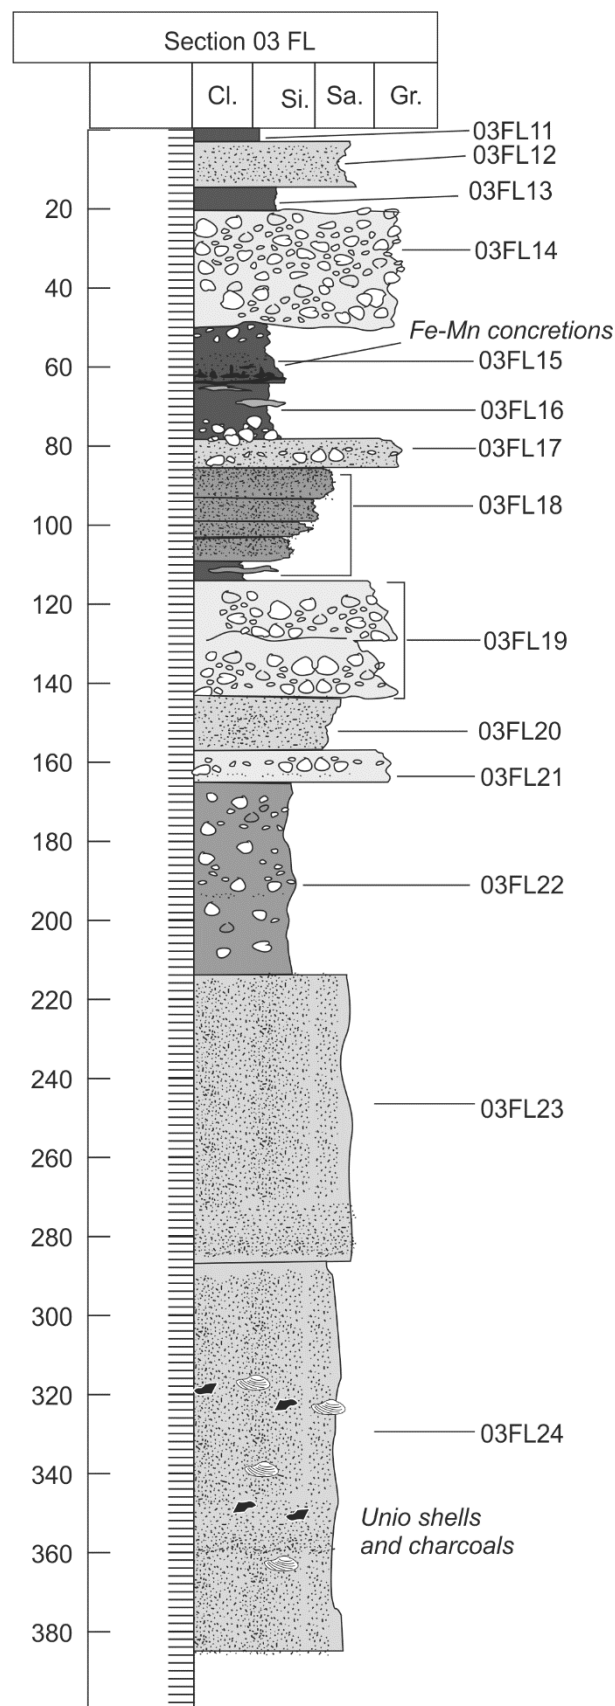

|        |    |                                                                                             |
|--------|----|---------------------------------------------------------------------------------------------|
|        |    | Plane parallel laminations are present.                                                     |
| 03FL21 | 9  | A bed of clast-supported gravel with local small lenses of dark silt embedded.              |
| 03FL22 | 48 | Massive bed of weakly sandy silt.                                                           |
| 03FL23 | 72 | Silty sand with interbedded thin layers of dark silts rich in organic matter.               |
| 03FL24 | 98 | Massive silty sand with frequent fragments and shells of <i>Unio</i> and diffuse charcoals. |

# Section 03PN

| Unit   | Thickness (cm) | Description                                                                                                                                                    |
|--------|----------------|----------------------------------------------------------------------------------------------------------------------------------------------------------------|
| 03PN01 | 15             | Well selected inversely graded coarse sands with clasts up to some mm and interbedded lenses of fine sands.                                                    |
| 03PN02 | 8              | Clayey silts with a small fraction of fine sand, finely laminated. Presence of interbedded thin layers rich in organic matter.                                 |
| 03PN03 | 54             | This unit includes four stacked banks of clast-supported gravels, with apparent imbrications (flow direction to the south) of subrounded to subangular clasts. |
| 03PN04 | 18             | Inversely graded thin bedded fine sands alternating with lenses of clayey silts. Plane-parallel fine laminations are present.                                  |
| 03PN05 | 20             | Matrix-supported gravel alternating with thin beds of sandy silt.                                                                                              |
| 03PN06 | 4              | Matrix-supported gravel alternating with laminated thin beds of sandy silt.                                                                                    |
| 03PN07 | 39             | A thick bed of sands normally and inversely graded.                                                                                                            |
| 03PN08 | 10             | Massive medium sand.                                                                                                                                           |
| 03PN09 | 50             | Massive clayey silts with dispersed cm sized clasts and abundant shells of <i>Unio</i> .                                                                       |

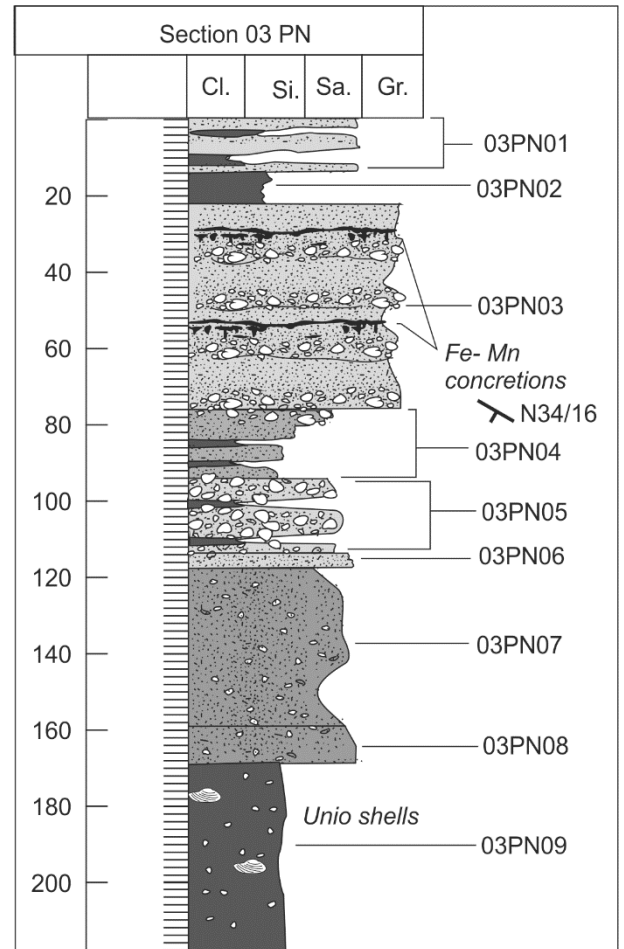

# Section 03PD

| Unit   | Thickness (cm) | Description                                                                                                                                                                                                                                                   |
|--------|----------------|---------------------------------------------------------------------------------------------------------------------------------------------------------------------------------------------------------------------------------------------------------------|
| 03PD01 | 10             | Weakly silty fine sands con thin plane parallel laminations                                                                                                                                                                                                   |
| 03PD02 | 12             | Silty/clayey fine sands.                                                                                                                                                                                                                                      |
| 03PD03 | 22             | Matrix supported gravel with subangular to subrounded clasts of max. some cm in radius into a sandy matrix. Sparse laminated clay-chips of fine-grained reworked units and alternating lenses of clean well-selected coarse sand. Some charcoals are present. |
| 03PD04 | 8              | Weakly silty fine sands passing upward to clean and well-selected coarse sand. Plane parallel lamination are present.                                                                                                                                         |
| 03PD05 | 68             | Clast-supported coarse gravel in a sandy matrix, roughly bedded. Locally, reddish to orange coatings of Fe are present.                                                                                                                                       |
| 03PD06 | 7              | A lens of weakly silty fine sands passing upward to clean and well-selected coarse sand. Plane parallel lamination are present.                                                                                                                               |
| 03PD07 | 210            | Coarse sands with sparse cm-sized clasts, subangular to sub-rounded.                                                                                                                                                                                          |
| 03PD08 | 10             | Clean and well-selected fine gravel                                                                                                                                                                                                                           |
| 03PD09 | 50             | Coarse sands with sparse cm-sized clasts, subangular to sub-rounded.                                                                                                                                                                                          |
| 03PD10 | 200            | Medium to coarse weakly laminated sands with interbedded a 30-cm thick lens of dark laminated silt.                                                                                                                                                           |
| 03PD11 | 80             | Beds of clean and well-selected gravel with subangular clasts alternating with badly selected coarse                                                                                                                                                          |

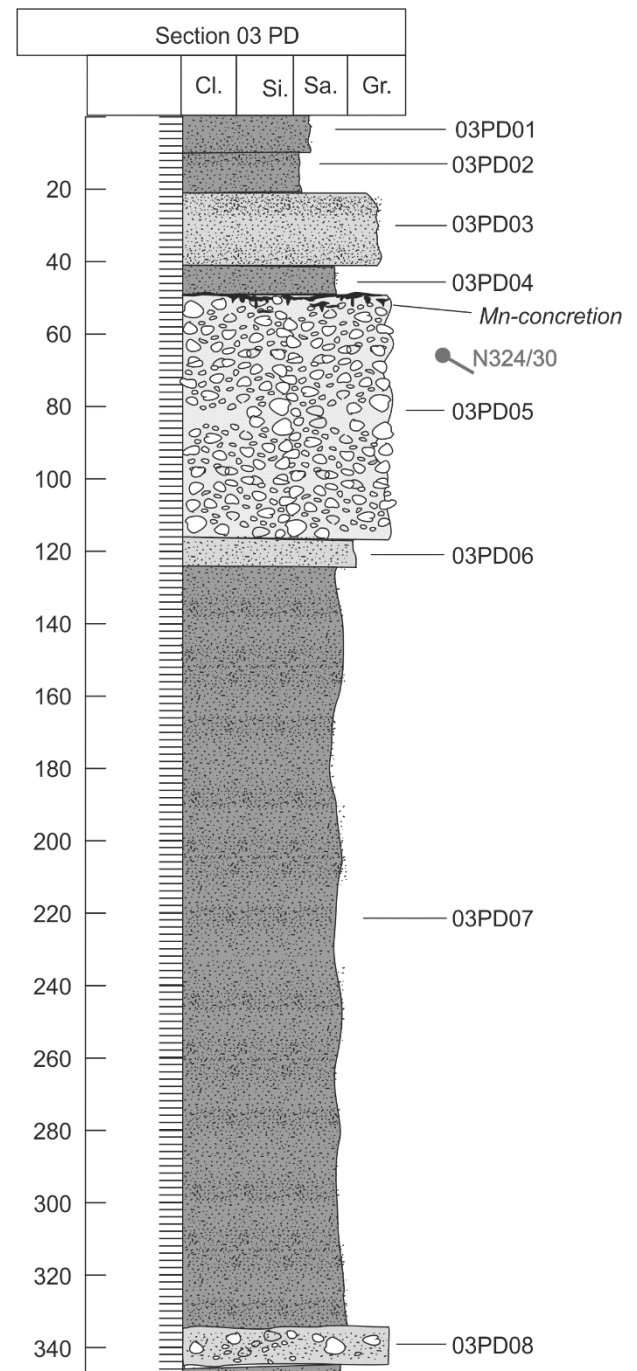



|        |     |                                                                                                                    |
|--------|-----|--------------------------------------------------------------------------------------------------------------------|
|        |     | sands. Reddish Fe coatings are diffuse. S0 N343/26                                                                 |
| 03PD12 | 15  | Weakly silty fine sands with thin plane parallel laminations. S0 N312/23                                           |
| 03PD13 | 100 | Matrix-supported conglomerates alternating with clean and well-selected gravel or badly selected gravel in lenses. |

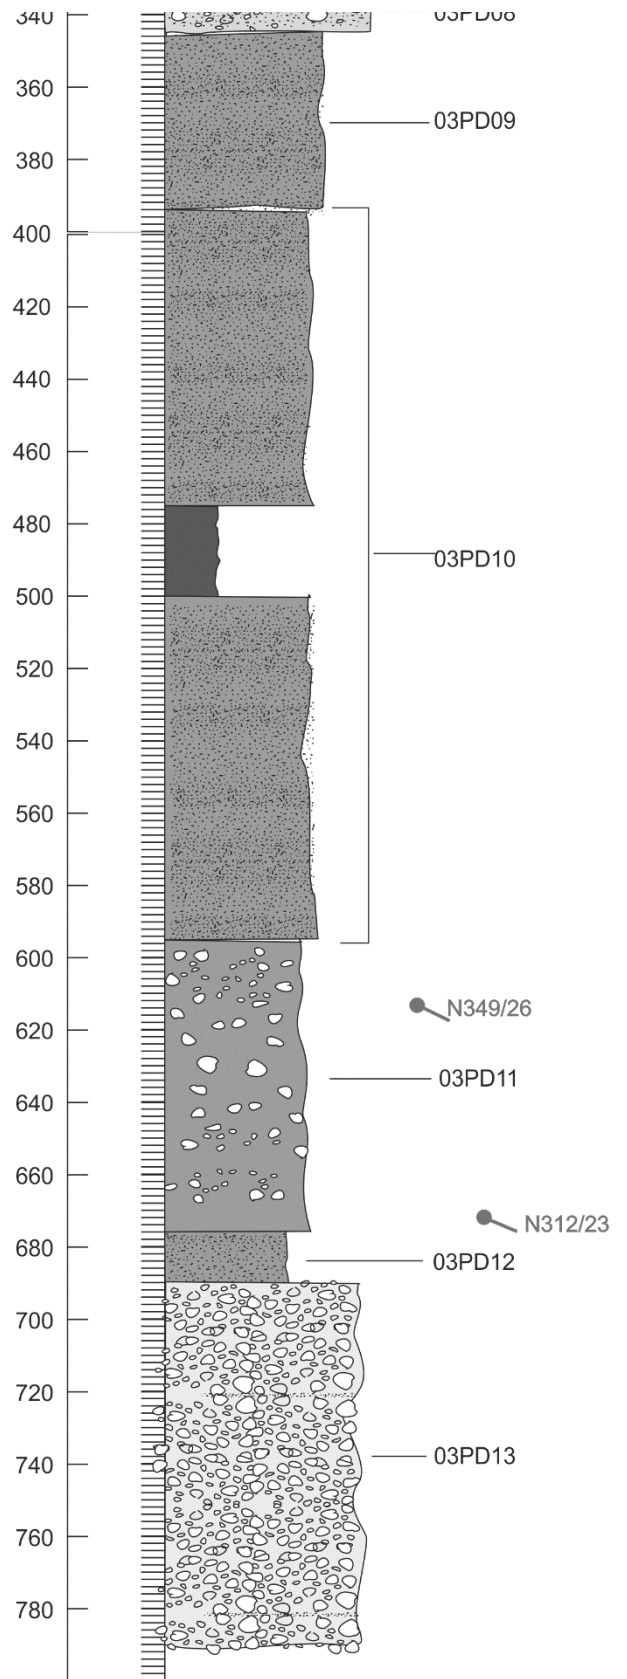

Supplement: Supplementary file 1 [file nhess-23-3407-2023-supplement.pdf]
